# Supplementary material
Source: PubMed Central journal article supplement (PMC4470771)

**A**

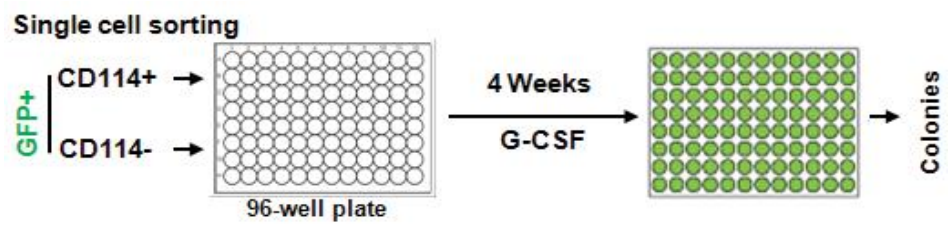

**B**

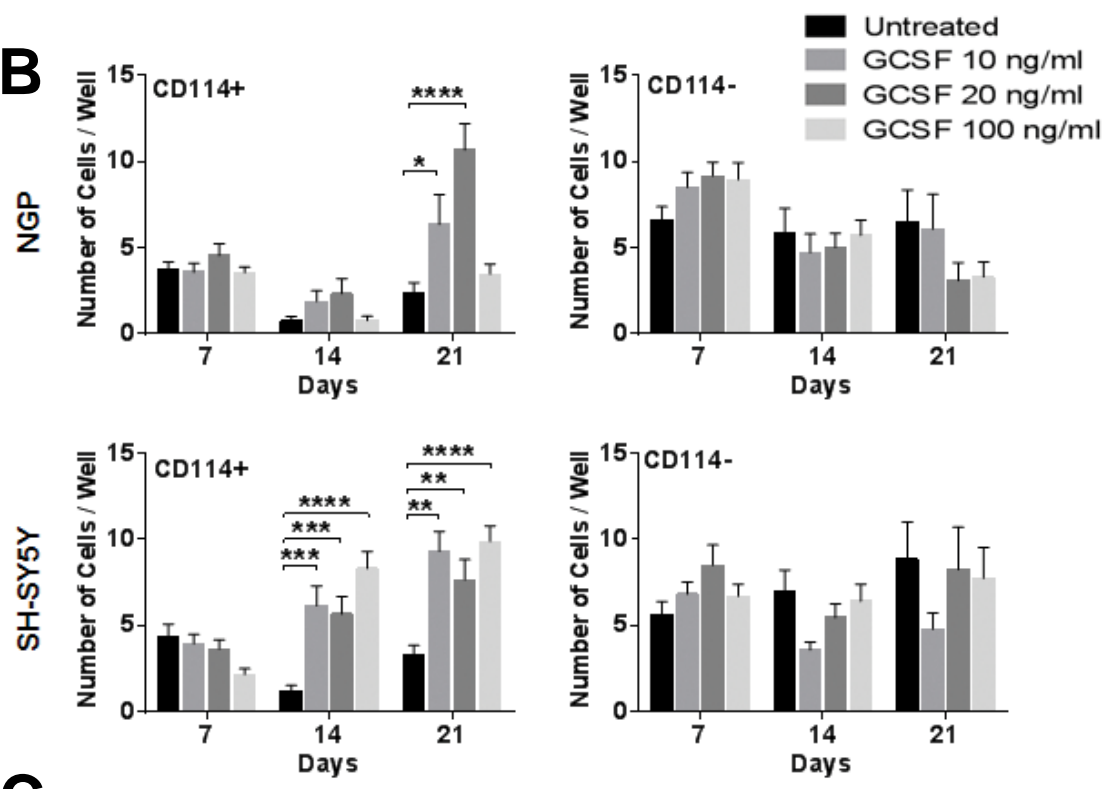

**C**

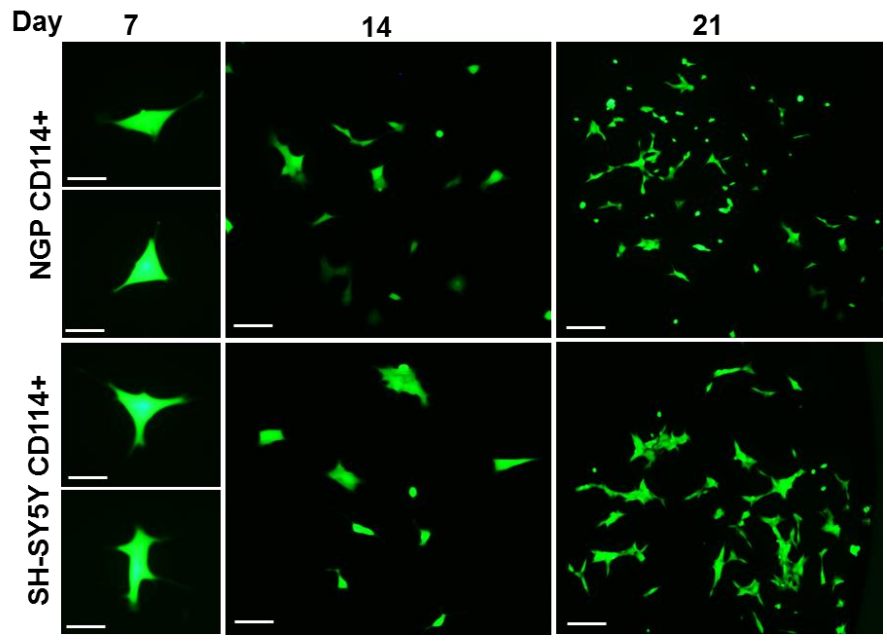

**A**

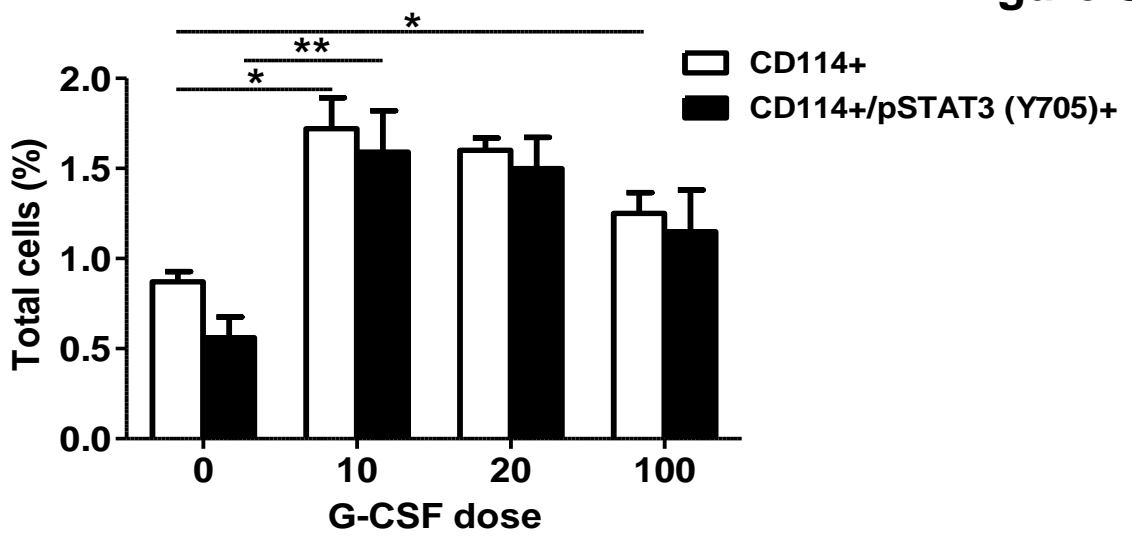

**B**

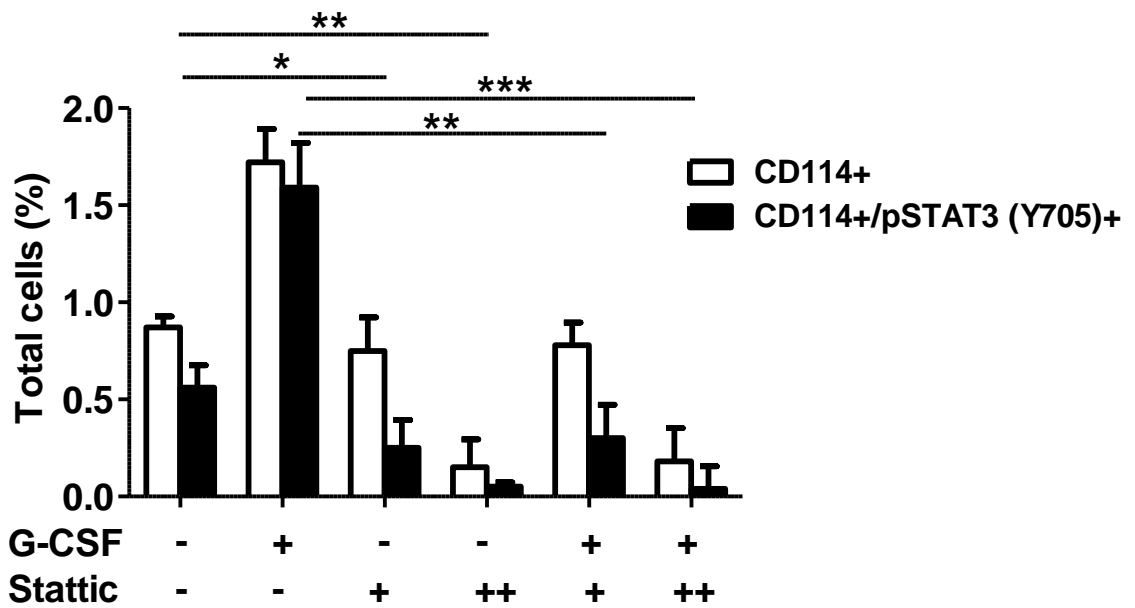

**C**

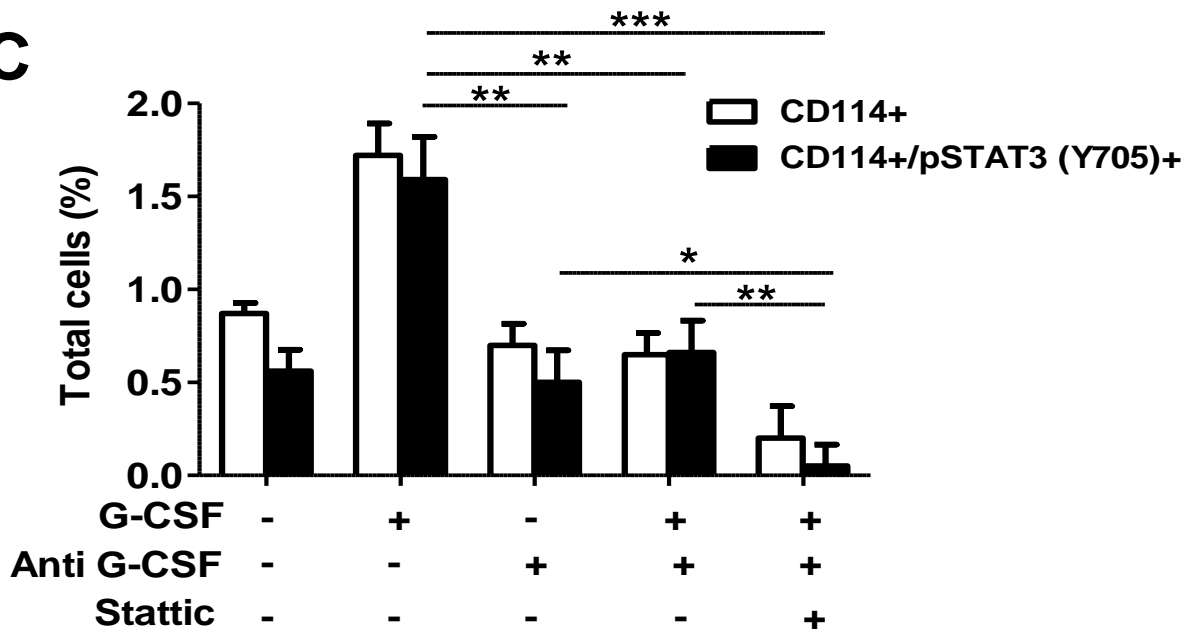

**A**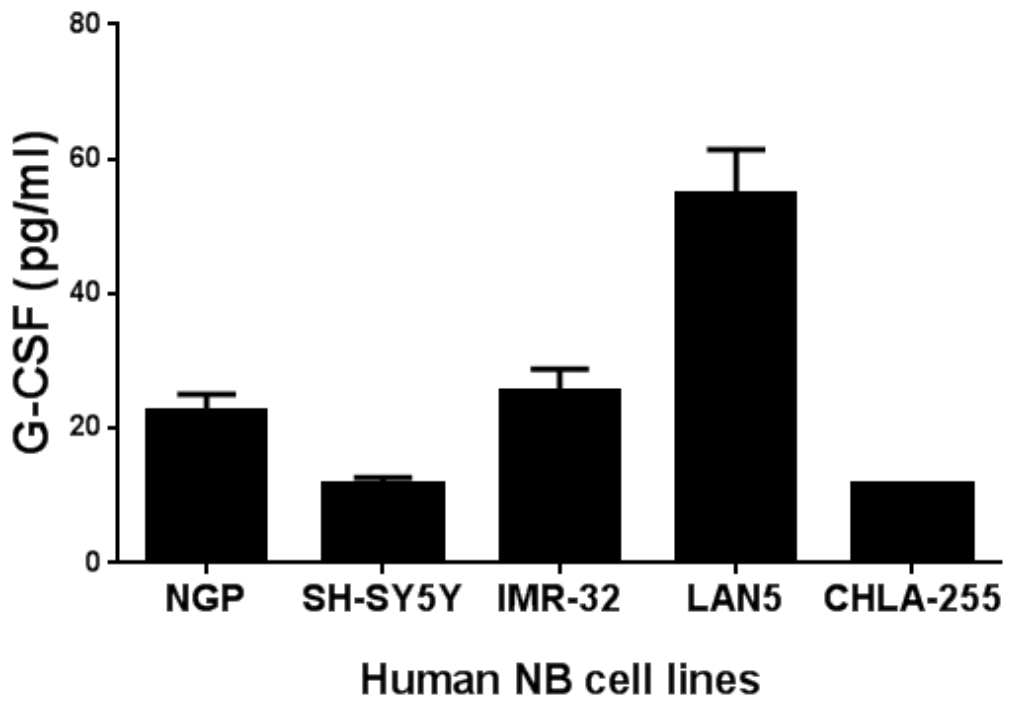**B**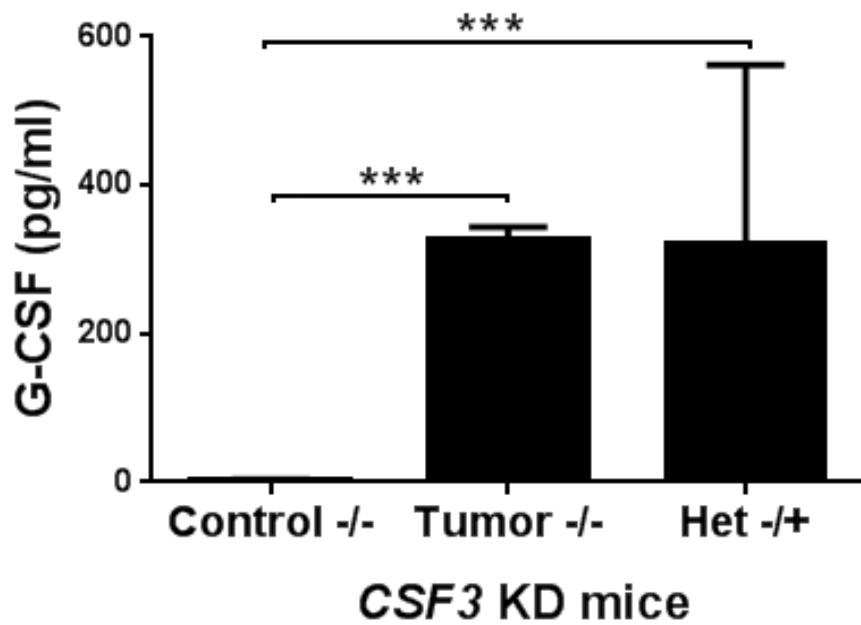

**A**

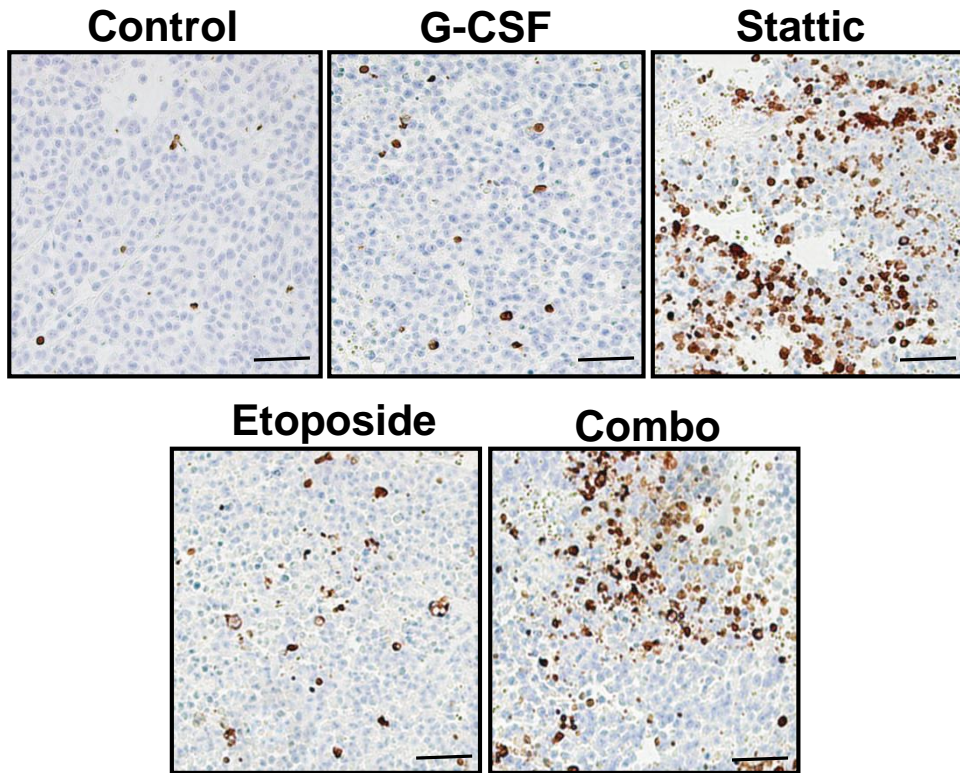

**B**

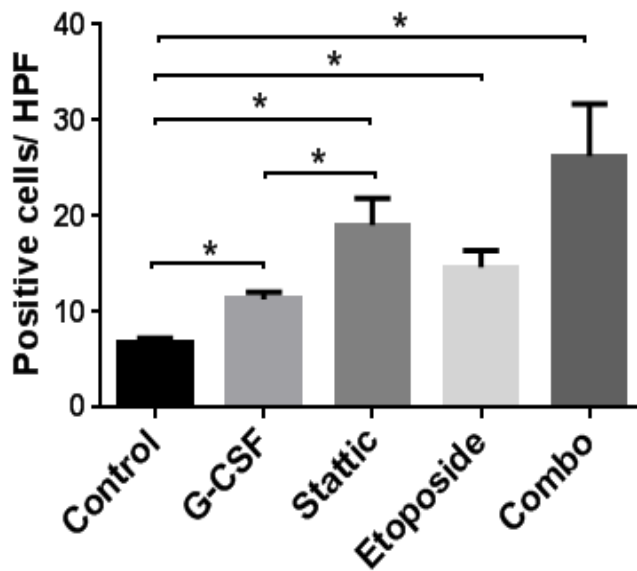

**A**

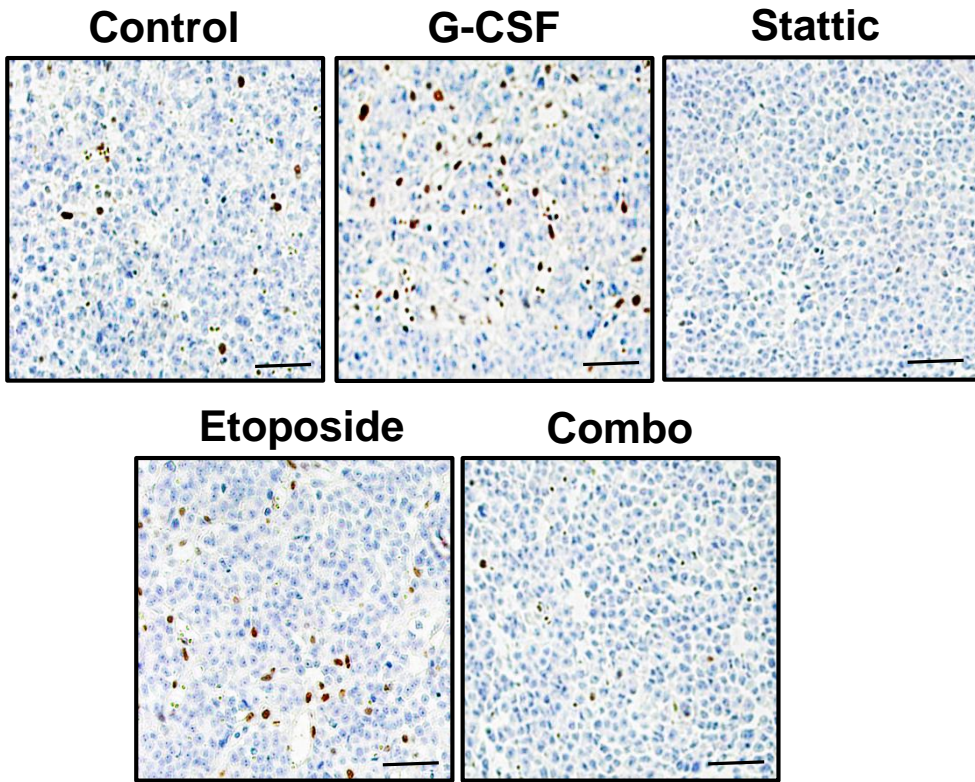

**B**

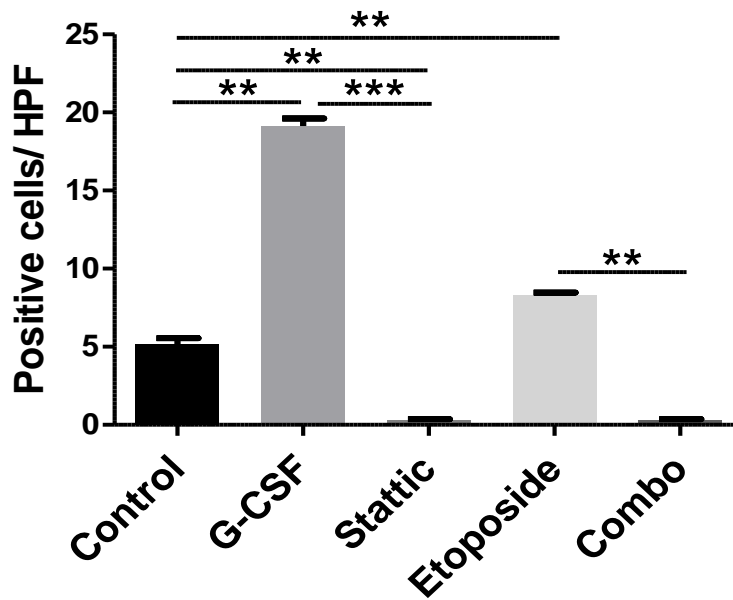

**A**

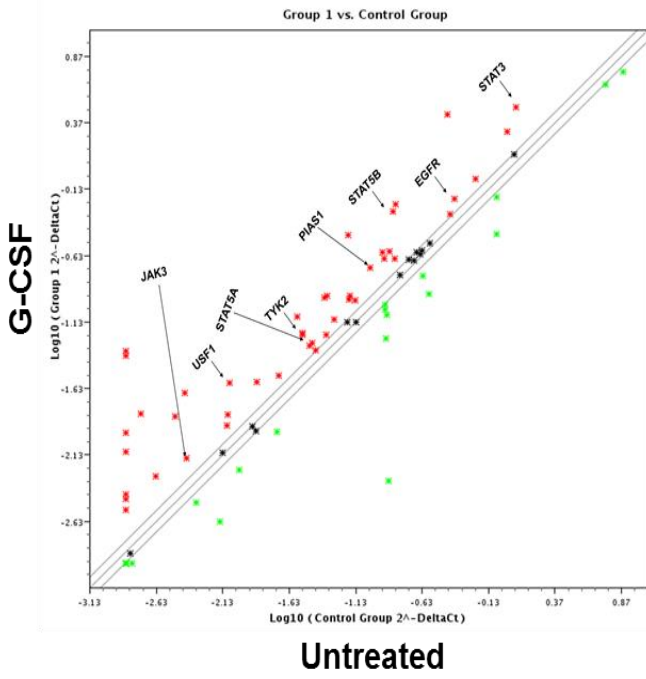

**B**

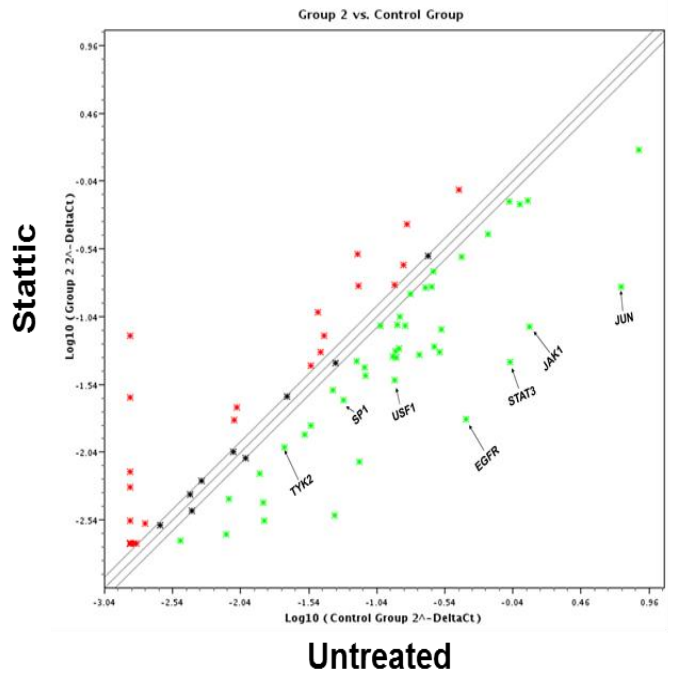

**C**

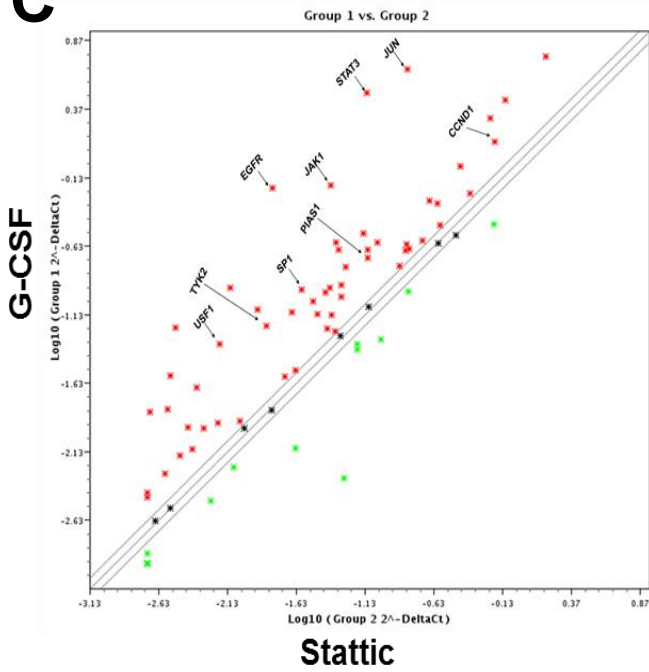

**D**

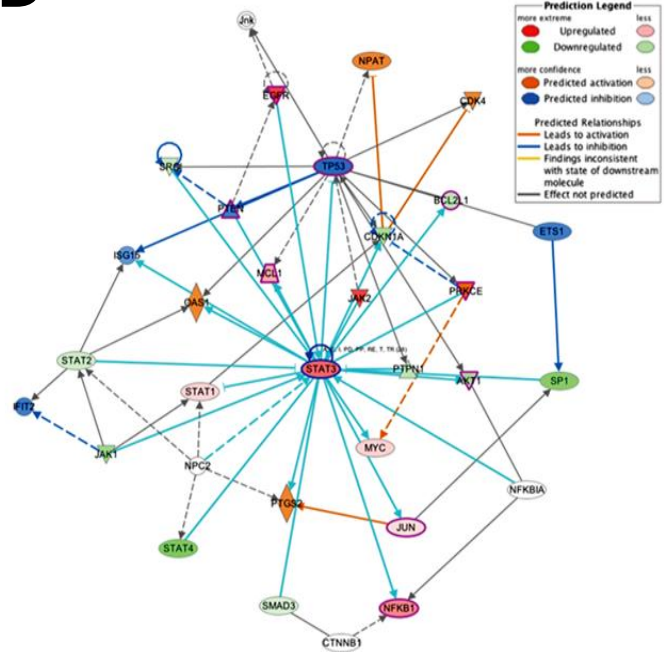

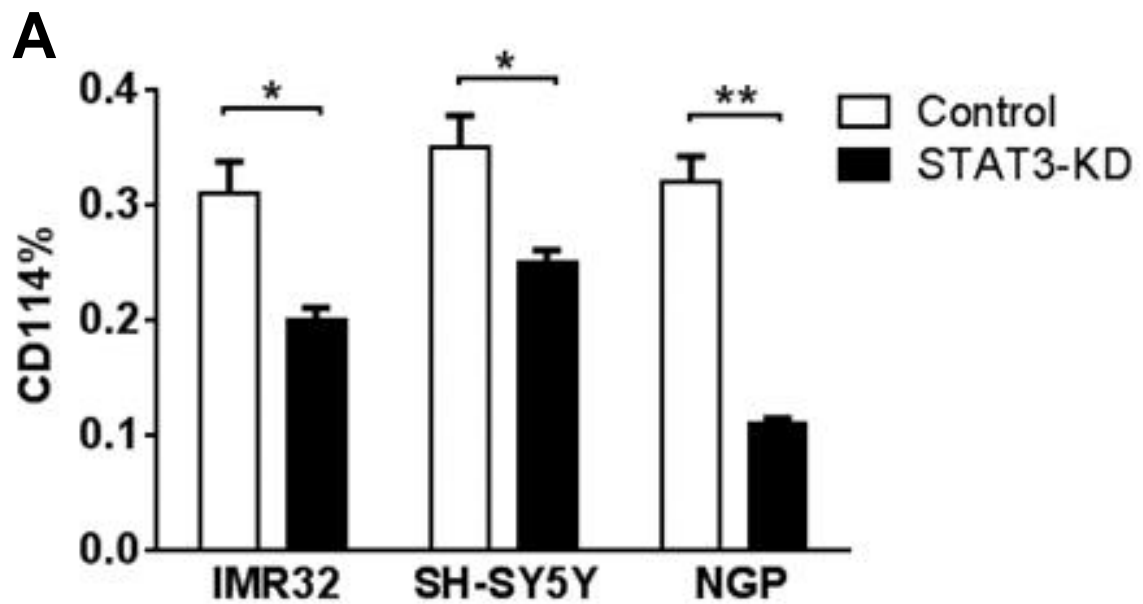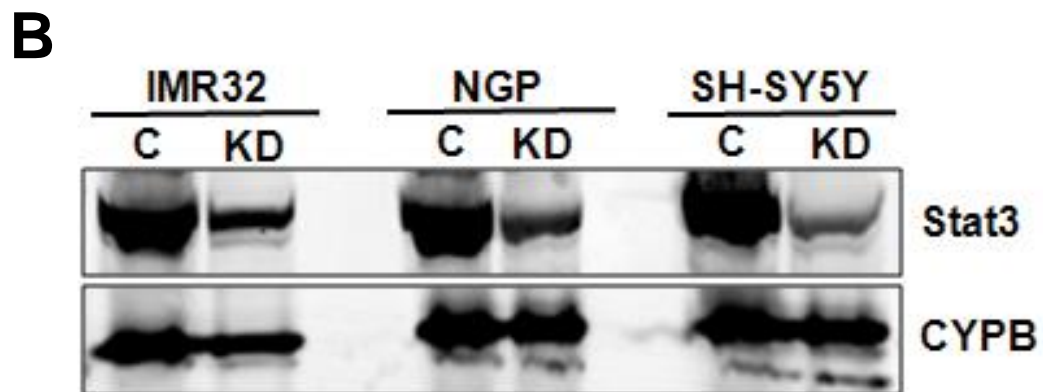

Supplement: NIHMS687493-supplement-s_figs.pdf [file NIHMS687493-supplement-s_figs.pdf]
